# Adaptive pathways of coral populations on the Great Barrier Reef

Mikhail V. Matz<sup>1\*</sup>, Eric A. Trembl<sup>2</sup>, Galina V. Aglyamova<sup>1</sup>, Madeleine J. H. van Oppen<sup>2,3</sup>  
and Line K. Bay<sup>3</sup>

<sup>1</sup> Department of Integrative Biology, University of Texas at Austin, 205 W 24th St. C0990,  
Austin, Texas 78712, USA

<sup>2</sup> School of BioSciences, University of Melbourne, Victoria 3010 Australia

<sup>3</sup> Australian Institute of Marine Science, QLD, Australia

\* Author for correspondence, [matz@utexas.edu](mailto:matz@utexas.edu)

## Abstract

Reef-building corals are extremely important for maintenance of marine biodiversity and coastal economy and are currently under severe threat from anthropogenic warming. Warming is predicted to drive preferential survival of warm-adapted genotypes that have migrated to cooler locations and result in an overall decline in genetic diversity due to bleaching-related mortality. To quantify these trends, we analyzed five populations of a common coral *Acropora millepora* along the latitudinal extent of the Great Barrier Reef (GBR). Population genomic analysis revealed that most populations were demographically distinct and that migration was indeed preferential southward, from lower (warmer) to higher (cooler) latitudes. However, no recent increase in southward migration was detectable, and inferred migration rates remained closely correlated with predictions of a biophysical model of larval dispersal based on ocean currents. There was also no evidence of recent declines in genetic diversity. A multi-locus adaptation model indicated that standing genetic variation spread across latitudes could be sufficient to fuel continuous adaptation of *A. millepora* metapopulation to warming over the next 100-200 years. Unexpectedly, we found that naturally low heritability of thermal tolerance in reef-building corals due to contribution from horizontally transmitted algal symbionts would facilitate longer metapopulation persistence. Still, despite good prospects for gradual adaptation, our model predicted increase in severity of mortality events due to random thermal anomalies, which could lead to much faster coral extinction if there are ecological feedbacks preventing rapid reef recovery.

**Significance statement:** Can long-lived organisms such as reef-building corals adapt fast enough to keep up with the historically unprecedented rate of sea surface warming? Here we combine population genomics, biophysical modeling, and evolutionary simulations to argue that populations of a common reef-building coral (*Acropora millepora*) spread across latitudes on the Great Barrier Reef could harbor sufficient genetic variation to fuel efficient adaptation to increasing temperature for another century and perhaps longer. However, corals will be increasingly more sensitive to extreme heat waves despite ongoing adaptation to gradual warming, which could precipitate their extinction much sooner. Our study underscores the key

42 role of standing genetic variation in the future persistence of coral reefs and calls for novel reef  
43 management strategies to facilitate natural adaptation process.

44

45 Hot water coral bleaching, caused by global warming, is devastating coral reefs around the world  
46 (1) but there is room for hope if corals can adapt to increasing temperatures (2). Many coral  
47 species have wide distributions that span environments that differ dramatically in their thermal  
48 regimes, demonstrating that efficient thermal adaptation has occurred in the past (3). But can  
49 coral adaptation keep up with the unprecedentedly rapid current rate of global warming (4)? One  
50 way for corals to achieve rapid thermal adaptation is through genetic rescue, involving the spread  
51 of existing heat tolerance alleles from low-latitude, warm-adapted populations to higher-latitude,  
52 warming regions, via larval migration (5, 6). We have previously demonstrated the presence of  
53 genetic variants conferring high thermal tolerance in a low-latitude *A. millepora* population (5). It  
54 can be expected that global warming will cause preferential survival of warm-adapted poleward  
55 migrants because they will be following their thermal optimum, whereas individuals migrating in  
56 the opposite direction would find themselves in increasingly mismatched environments (Fig. 1 A,  
57 B). Another likely population-level effect of recent declines in coral cover (7) is a reduction in  
58 overall genetic diversity, potentially limiting both the scope and the rate of adaptation.

59

60 Here, we test these predictions in *Acropora millepora*, a common reef-building coral from the  
61 most ecologically prominent and diverse coral genus in the Indo-Pacific (staghorn corals,  
62 *Acropora*). We have analyzed genome-wide genetic variation using 2bRAD (8) in five  
63 populations of *A. millepora* along the latitudinal range of the GBR (Fig. 1 A). We genotyped 18-  
64 28 individuals per population at >98% accuracy and with a >95% genotyping rate. Analysis of  
65 population structure based on ~11,500 biallelic SNPs separated by at least by 2,500 bases agreed  
66 with previous microsatellites results (9, 10), and revealed very low levels of genetic divergence,  
67 with only the Keppel Islands population being potentially different from the others (Fig. 1 D and  
68 Fig. S1). We observed increasing genetic divergence with geographical distance (“isolation by  
69 distance”, Fig. 1 C) that supports population divergence, however, pairwise  $F_{ST}$  were small and  
70 did not exceed 0.014 even between the southernmost and northernmost populations (Keppel and  
71 Wilkie). To gain a deeper insight into coral demography, we used Diffusion Approximation for  
72 Demographic Inference (*dadi*, (11)) to more rigorously test for population subdivision and infer  
73 pairwise migration rates among populations and population sizes. *dadi* is a coalescent-based  
74 method that optimizes parameters of a pre-specified demographic model to maximize the  
75 likelihood of generating the observed allele frequency spectrum (for two populations it is  
76 essentially a two-dimensional histogram of allele frequencies, Fig. S2). Being a likelihood-based  
77 method, *dadi* can be used to compare alternative models using likelihood ratio tests and Akaike  
78 Information Criterion (AIC).

79

80 We used AIC to confirm that our populations are separate demographic units. For each pair of  
81 populations we generated 120 bootstrapped datasets by resampling genomic contigs and  
82 performed delta-AIC comparison of two demographic models, a split-with-migration model and a  
83 no-split model (Fig. S3 B). The split-with-migration model assumed two populations that have

84 split some time  $T$  in the past, potentially have different sizes  $N1$  and  $N2$ , and exchange migrants  
85 at different rates ( $m12$  and  $m21$ ) depending on direction. The no-split model allowed for ancestral  
86 population size to change at time  $T$  but not for a population split, so the experimental data were  
87 modeled as two random samples from the same population of size  $N$ . The majority of bootstrap  
88 replicates (88-100%) showed AIC advantage of the split-with-migration model for all but one  
89 pair of populations (Sudbury-Magnetic, 39% bootstrap support; Fig. S3). This indicates that the  
90 populations are demographically distinct despite very low  $F_{ST}$ . This result highlights the power of  
91 coalescent analysis relative to classical approaches (such as  $F_{ST}$ ) that assume genetic equilibrium,  
92 i.e., that populations have been stable for thousands of generations.  
93

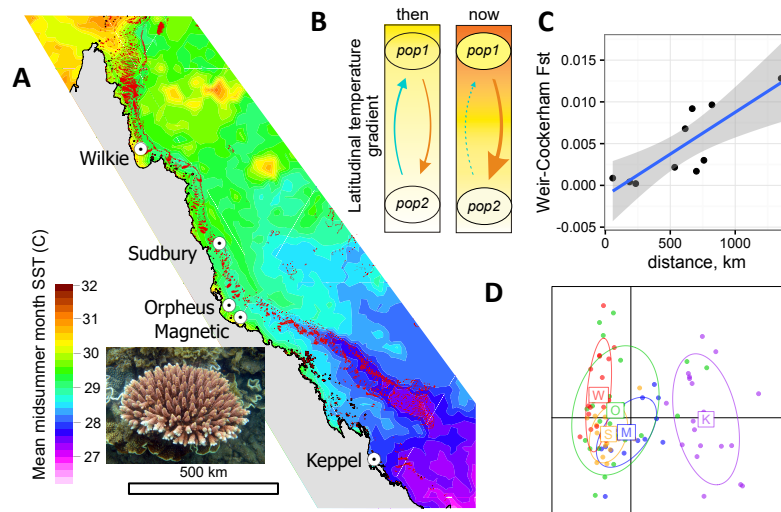

94  
95 **Figure 1.** The population setting and background for our study. (A) Locations of sampled populations  
96 where mean midsummer month sea surface temperature differed by up to  $\sim 3^{\circ}\text{C}$ . Inset: *Acropora millepora*.  
97 (B) Working hypothesis under global warming: Warm-adapted low-latitude genotypes that migrate to  
98 higher latitudes would be following their physiological optimum and hence expected to survive better than  
99 migrants in the opposite direction. (C) Increase of pairwise  $F_{ST}$  with distance, both indicating weak genetic  
100 divergence along the GBR, and (D) principal component analysis of genome-wide genetic variation. On  
101 panel D, centroid labels are initial letters of population names as in panel A.  
102

103 We then determined pairwise migration rates from the split-with-migration model and estimated  
104 their confidence limits from bootstrap replicates. For all pairwise analyses except Wilkie-Sudbury  
105 migration in southward direction exceeded northward migration, and this difference was  
106 significant in seven out of nine cases (Fig. 2 A and Fig. S3A). Linear mixed model analysis of  
107 direction dependent mean migration rates with a random effect of destination (to account for  
108 variation in total migration rate) confirmed the overall significance of this southward trend  
109 ( $P_{\text{MCMC}} < 1e-4$ ).  
110

111 It is important to note that our pairwise migration rates captured the cumulative effect of genetic  
112 exchange between populations, which included direct migration and the spread of alleles via other

113 stepping-stone populations. Such rates do not directly reflect the numbers of larvae exchanged  
 114 between populations but are very informative in the genetic rescue context. They represent the  
 115 per-generation rate of replacement of the destination population genotypes by genotypes from the  
 116 source population, which is essentially the rate at which genetic rescue could proceed.

117

118 To investigate whether the southward migration bias was due to higher survival of southward  
 119 migrants relative to northward migrants, as predicted under global warming (Fig. 1 B), we  
 120 developed a biophysical model of coral larval dispersal on the Great Barrier Reef. This model  
 121 quantified the per-generation migration potential among coral reef habitat patches in the GBR  
 122 based on ocean currents and parameters of larval biology (12, 13). We found that the genetic and  
 123 biophysical migration rates were very closely correlated (Mantel test:  $r = 0.79$ ,  $P = 0.008$ , Fig. 2  
 124 C).

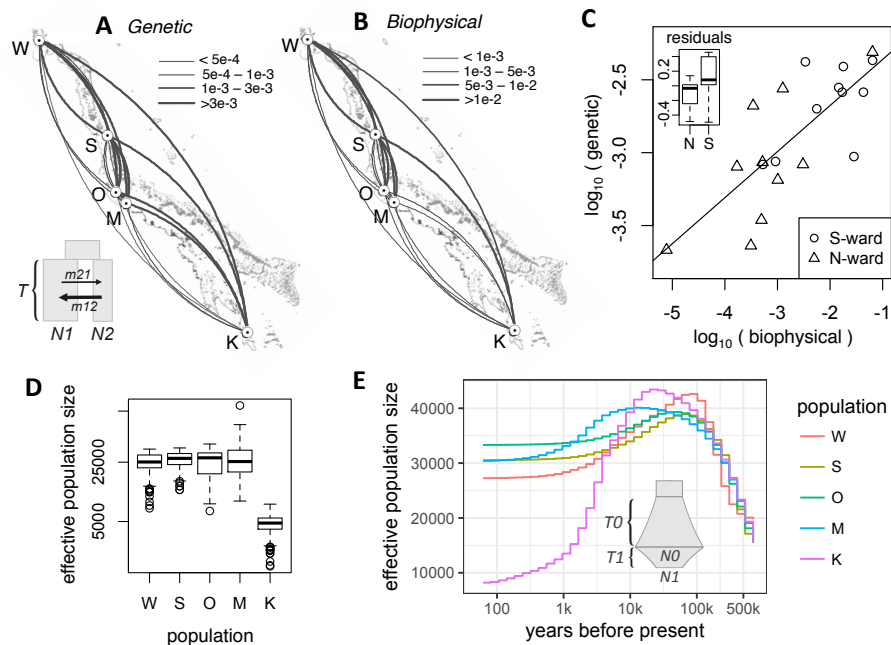

125

126

127 **Figure 2.** Demography of *A. millepora* populations on the GBR. (A) Arc-plot of migration rates among  
 128 populations reconstructed from population genetic data. Inset: *dadi* model used: ancestral population splits  
 129 into two populations of unequal sizes (N1 and N2) some time T in the past, these populations exchange  
 130 migrants at different rates depending on direction. (B) Migration rates according to the biophysical model.  
 131 On panels A and B, the arcs should be read clockwise to tell the direction of migration; line thickness is  
 132 proportional to the migration rate. (C) Correlation between log-transformed biophysical and genetic  
 133 migration rates (Mantel  $r = 0.79$ ,  $P = 0.008$ ). Inset: box-plot of residuals from the linear regression.

134 Southward migration tends to exceed northward migration even after accounting for predictions of the  
 135 biophysical model ( $P = 0.058$ ), suggesting higher survival of southward migrants. (D) Box plot of effective  
 136 population sizes inferred by the split-with-migration model (panel A) across all population pairs and  
 137 bootstrap replicates. (E) Historical changes in effective population sizes inferred using a single-population  
 138 *dadi* model with two periods of exponential growth ( $T_0$  and  $T_1$ , reaching sizes  $N_0$  and  $N_1$ , inset), averaged  
 139 across bootstrap replicates.

140 Although the biophysical model explained most of the southward migration bias in the genetic  
141 data, the residuals were still in favor of southward migration (Fig. 2 C, inset;  $P = 0.058$ ).

142 While this residual excess suggest preferential survival of southward migrants, as predicted by  
143 our hypothesis (Fig. 1 B). These genetic predictions represent historical averages since the  
144 populations split and did not resolve any potential recent migration changes.

145

146 To determine any recent changes in southward migration, we evaluated a similar basic split-with-  
147 migration model (Fig. 2A) that allowed for a change in migration over the past 75-100 years. The  
148 new model suggested some recent migration changes, but there was no consistent change between  
149 northward and southward migration (Fig. S4). Delta-AIC bootstrap analysis favored the new  
150 model over the basic one only for two pairs of populations, Wilkie-Orpheus and Wilkie-Magnetic  
151 (85 and 60% bootstrap support, respectively). We conclude that with the current data and analysis  
152 techniques we cannot yet detect the effect of recent warming on preferential direction of coral  
153 migration along the GBR.

154

155 The GBR has already warmed by  $0.8^{\circ}\text{C}$  since the end of last century (14) and may have already  
156 reduced genetic diversity in *A. millepora* populations. We used *dadi* to infer effective population  
157 sizes, which is a measure of genetic diversity and one of the key parameters determining the  
158 population's adaptive potential (15). The results of the split-with-migration model (Fig. 2 A)  
159 were consistent for all population pairs and indicated that Keppel population was about one-fifth  
160 the size of others (Fig. 2 D, E). This result was not surprising since the Keppel population  
161 frequently suffers high mortality due to environmental disturbances and was therefore is expected  
162 to show diminished long-term effective population size (9). We also used a single-population  
163 *dadi* model that allowed for two consecutive growth/decline periods (Fig. 2 E, inset) to  
164 reconstruct effective sizes of individual populations through time (Fig. 2 E and Fig S5). All  
165 populations showed evidence of growth prior to the last glaciation, 500-20 thousand years ago  
166 (Fig 2 E), which aligned well with the fossil record of rising dominance of *Acropora* corals on  
167 Indo-Pacific reefs during this period (16). It has been suggested that the fast growth and early  
168 sexual maturation of *Acropora* corals gave them an advantage relative to most other reef-building  
169 corals during dynamic changes in the reef-forming zone due to the sea level changes  
170 accompanying glacial cycles (16). Our results suggest that *A. millepora* populations have been in  
171 stasis or slow decline since sea level changes abated (Fig. S5), although the inclusion of an  
172 additional growth/decline period only improved the model fit significantly for the Keppel  
173 population (Fig S6). None of the populations showed evidence of accelerated decline in effective  
174 population size over the past few hundred years. Although our samples were collected in the  
175 early-mid 2000s, our results are still relevant since they characterize populations only two-three  
176 coral generations ago. Disturbances that have affected corals since then would not yet have  
177 substantially impacted genetic diversity.

178

179 To evaluate whether standing genetic variation contributed by local thermal adaptation could  
180 sustain evolution of the *A. millepora* metapopulation in response to warming, we have developed  
181 a multi-QTL model of metapopulation adaptation in SLiM (17). The model was parameterized

182 with population sizes and migration rates inferred from the genetic analysis (Fig. 2 A, D), and  
183 with differences in midsummer monthly mean temperature among populations (Fig. 1 A). The  
184 number of QTLs and their effect sizes, phenotypic plasticity (standard deviation of the Gaussian  
185 slope of fitness decline when phenotype mismatches the environment) and heritability (proportion  
186 of phenotypic variation attributable to genetics) can all be varied in the model. It can also  
187 incorporate climate scenarios with any combination of directional, cyclical and random changes.  
188 The model also allows for new mutations but here the new mutation rate was set to zero. This was  
189 to assess the contribution of only the standing genetic variation that was introduced into  
190 populations at the start of simulation as random QTL effects. The climate scenario started with a  
191 pre-adaptation to local thermal conditions for 2,000 generations. Assuming a generation time of  
192 of 5 years in *A. millepora* (18) this corresponded to the period of stable temperature since the last  
193 deglaciation. After pre-adaptation, the temperature was increased at a rate of 0.05°C/generation in  
194 all populations, corresponding to the projected 0.1°C warming per decade (19). Throughout the  
195 simulation temperature was allowed to fluctuate randomly between generations to approximate El  
196 Nino Southern Oscillation (ENSO): the temperature deviations were drawn from a normal  
197 distribution with a standard deviation of 0.25°C. The size of populations was kept constant  
198 throughout the pre-adaptation period and scaled linearly with the populations' relative fitness  
199 (mean current fitness divided by the mean fitness at the end of pre-adaptation period) during  
200 warming. Migration rates from a population also scaled linearly with the population's fitness. In  
201 this way, a population declining in fitness would shrink in size and stop contributing migrants to  
202 other populations.

203  
204 Our model suggested that, with only ten thermal QTLs, under all combinations of heritability and  
205 plasticity the pre-adapted metapopulation would be able to persist through the warming for at  
206 least 50-100 generations and, in some realistic cases, much longer (Fig. 3 and Figs. S7-S8).  
207 Migration in general and southward migration in particular substantially contributed to this  
208 persistence (Fig. 3 E, F), underscoring the importance of the spread of warm-adapted genotypes  
209 from lower to higher latitudes (5).

210  
211 Predictably, higher phenotypic plasticity promoted population persistence and stability against  
212 random thermal anomalies, but we were rather surprised to observe a similar positive effect of  
213 lower heritability, set to the values observed in coral quantitative genetics experiments (0.25-0.5,  
214 (17); Fig 3, Fig. S7). One specific reason why corals are expected to show low heritability of  
215 thermal tolerance is that much of natural variation in this trait in corals is due to the type of algal  
216 symbionts (*Symbiodinium* spp. (20)). Photo-symbionts are not transmitted from parent to  
217 offspring in the majority of coral species (21), and although host genetics can have some effect on  
218 the choice of *Symbiodinium* in the next generation (22) environment has a very strong effect on  
219 this association (20, 23). Higher persistence under low heritability and high plasticity is most  
220 likely explained by the fact that they both allow for higher standing genetic variation to be  
221 retained in populations (Fig. S9). During warming, this variation lasts longer as a source of  
222 adaptive genetic variants, enabling up to 5°C increase in mean thermal tolerance over 150  
223 generation (Fig. 3 G and Fig. S7). Higher plasticity partially rescued the drop in fitness due to low

224 heritability (Fig. 3 B and D, Fig. S7). Another notable tendency observed with all parameter  
 225 settings was that during warming the fitness (and hence the size) of adapting populations began to  
 226 fluctuate following random thermal anomalies, and the amplitude of these fitness fluctuations  
 227 increased as the warming progressed even though the amplitude of thermal anomalies did not  
 228 change (Fig. 3 H). These fluctuations correspond to severe mortality events induced by thermal  
 229 extremes due to ENSO and affected warm-adapted populations most, which very much resembles  
 230 the situation currently observed throughout the world (1).  
 231

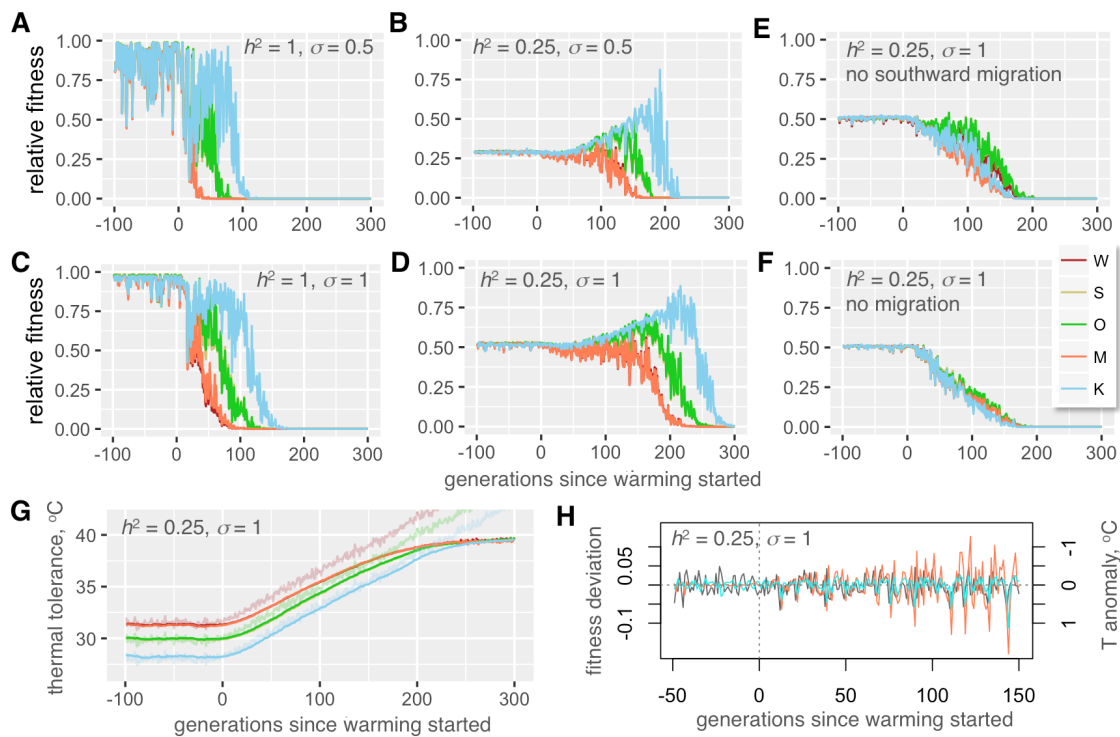

232  
 233 **Figure 3.** Modeling coral metapopulation persistence under global warming. (A-D) Fitness of modeled  
 234 populations depending on heritability of thermal tolerance ( $h^2$ , proportion of tolerance variation  
 235 explained by genetics), phenotypic plasticity ( $\sigma$ , standard deviation of the Gaussian slope of fitness decline away from  
 236 the phenotypic optimum, in degrees C), and presence-absence of migration (E, F). On panels A-F, y-axis is  
 237 observed fitness relative to maximal fitness at the genetically determined optimum, averaged over all  
 238 individuals in a population. Warm-adapted populations (W and M) are shown as red-tint traces, populations  
 239 from mild thermal regime (S and O) are green-tint traces, and the cool-adapted population (K) is the blue  
 240 trace. Note nearly complete overlap between traces for pairs of populations pre-adapted to the same  
 241 temperature (W,M and S,O). (G) Thermal tolerances of evolving populations. Thin noisy lines are modeled  
 242 temperatures at different locations. (H) Modeled random temperature anomalies (grey line) and fluctuations  
 243 in populations' fitness (the colored lines are residuals from loess regression over fitness traces on panel D;  
 244 Wilkie: orange line, Keppel: blue line). Note the inverse sign of temperature anomalies: this more clearly  
 245 shows the correspondence between rise in temperature and drop in fitness in the next generation. As  
 246 warming progresses, populations (especially originally warm-adapted ones) become increasingly sensitive  
 247 to random temperature fluctuations.  
 248

249 There are several uncertainties in our model associated with coral biology. Higher number of  
250 QTLs and/or their larger effect sizes would promote higher genetic variation and lead to longer  
251 population persistence. To keep the analysis conservative, our model included only ten QTLs,  
252 which is likely much fewer than the actual number of thermal QTLs in acroporid corals (20). We  
253 also kept the distribution of QTL effect sizes narrow: with the current settings and ten QTLs, at  
254 the start of simulation only about 2% of corals deviated from the mean thermal tolerance by more  
255 than 1.5°C in either direction. Such narrow variation makes adaptation to the thermal gradient of  
256 ~3°C along the GBR non-trivial, but still, at present there is no experimental data to evaluate  
257 whether even such narrow variation is realistic. Our model was also conservative in using  
258 effective population sizes suggested by genetic analysis as census sizes. In highly fecund marine  
259 organisms census sizes tend to substantially exceed effective population sizes, sometimes by  
260 orders of magnitude (24), which would strongly promote higher genetic diversity and population  
261 persistence. Moreover, we modeled only our five populations rather than the whole GBR, which  
262 would have resulted in much higher standing genetic variation in the metapopulation, promoting  
263 longer persistence.

264  
265 As for phenotypic plasticity, in simulations shown on Fig. 3,  $\sigma = 0.5$  and  $\sigma = 1$  corresponded to  
266 86% and 40% decline in fitness if the individual's phenotype mismatched the environment by  
267 1°C. The existing data on the issue of coral thermal plasticity are somewhat conflicting. One  
268 study shows that acroporid corals can successfully acclimatize to environments differing in  
269 maximum temperatures by as much as 2°C (25); however, another study found that coral grew  
270 52-80% more slowly when transplanted among locations differing by 1.5°C average temperature,  
271 (26). Although it is not possible to directly place these results into our quantitative plasticity  
272 framework, the former study supports the higher plasticity setting ( $\sigma = 1$ ) while the latter study  
273 supports  $\sigma = 0.5$ . It must also be noted that both these studies involved *in situ* transplantations and  
274 hence the effect of temperature remains confounded with other local fitness-affecting  
275 environmental parameters. Also, in adult corals plasticity is likely lower than in larvae and  
276 recruits, which are expected to exhibit non-reversible developmental plasticity associated with  
277 metamorphosis and establishment within a novel environment (27). Future experiments that  
278 expose multiple genetically distinct coral individuals to a range of temperatures under controlled  
279 laboratory settings are required to rigorously quantify variation in thermal optima and plasticity in  
280 natural populations.

281  
282 In conclusion, we found that genetic diversity and migration patterns of our study species were  
283 not yet affected by global warming and were well positioned to facilitate persistence of the GBR  
284 metapopulation for a century or more. However, despite ongoing adaptation to gradual  
285 temperature increase, corals will become increasingly more sensitive to local thermal anomalies,  
286 especially among the originally warm-adapted populations. The 10-85% mortality in the Northern  
287 GBR as a result of 2016 bleaching event (28) could be a particularly sobering recent  
288 manifestation of this trend. Our model assumed that recovery from such mortality events would  
289 depend solely on the demographic exchange between coral populations. However, ecological  
290 feedbacks such as shifts to an alternative ecological stable state (29) might substantially decrease



291 the rate of reseeded and recovery of affected reefs. In that case, the increase in severity of  
292 bleaching-related mortality might lead to much faster coral extinction than predicted by our  
293 model.

294  
295 More research into phenotypic plasticity and genetic variation in coral thermal tolerance and its  
296 genetic architecture (number of QTLs and their effect sizes) is needed to further improve the  
297 predictive power of our model. The estimated migration in the order of 10 - 100 migrants per  
298 generation could be feasibly facilitated by assisted gene flow efforts (30) without risking  
299 disruption of the natural local adaptation patterns (31). Corals are declining on reef world-wide  
300 and there is an urgent need to develop new solutions to effectively manage the impacts of global  
301 processes such as climate change at local management scales. The broad characterization of  
302 genetic diversity, local thermal adaptation and migration pathways in multiple reef-building coral  
303 species would greatly inform both traditional spatial management and novel assisted gene flow  
304 approaches and should therefore be given high priority.

305

## 306 **Methods**

307

### 308 *Genotyping*

309

310 This study relied predominantly on samples described by van Oppen et al (10), with addition of  
311 several samples from Orpheus and Keppel islands that were used in the reciprocal transplantation  
312 experiment described by Dixon et al (32). The samples were genotyped using 2bRAD (8)  
313 modified for Illumina sequencing platform; the latest laboratory and bioinformatics protocols are  
314 available at [https://github.com/zoon/2bRAD\\_GATK](https://github.com/zoon/2bRAD_GATK). BcgI restriction enzyme was used and the  
315 samples retained for this analysis had 2.3-20.2 (median: 7.45) million reads after trimming and  
316 quality filtering (no duplicate removal was yet implemented in this 2bRAD version). The reads  
317 were mapped to the genome of the outgroup species, *Acropora digitifera* (33, 34), to polarize the  
318 allelic states into ancestral (as in *A. digitifera*) and derived, e.g., (35, 36). Genotypes were called  
319 using GATK pipeline (37).

320

321 Preliminary analysis of sample relatedness using vcftools (38) revealed that our samples included  
322 several clones: four repeats of the same genotype from the Keppel Island (van Oppen et al (10)  
323 samples K210, K212, K213 and K216), another duplicated genotype from Keppel (samples K211  
324 and K219), and one duplicated genotype from Magnetic Island (samples M16 and M17). All  
325 other samples were unrelated. We took advantage of these clonal replicates to extract SNPs that  
326 were genotyped with 100% reproducibility across replicates and, in addition, appeared as  
327 heterozygotes in at least two replicate pairs (script replicatesMatch.pl with hetPairs=2 option).  
328 These 7,904 SNPs were used as “true” SNP dataset to train the error model to recalibrate variant  
329 quality scores at the last stage of the GATK pipeline. During recalibration, we used the transition-  
330 transversion (Ts/Tv) ratio of 1.438 determined from the “true” SNPs to assess the number of false  
331 positives at each filtering threshold (as it is expected that an increase of false positive calls would  
332 decrease the Ts/Tv ratio towards unity). We chose the 95% tranche, with novel Ts/Tv = 1.451.

333 After quality filtering that restricted the calls to only bi-allelic polymorphic sites, retained only  
334 loci genotyped in 95% or more of all individuals, and removed loci with the fraction of  
335 heterozygotes exceeding 0.6 (possible lumped paralogs), we ended up with 25,090 SNPs. In total,  
336 2bRAD tags interrogated 0.18% of the genome. The genotyping accuracy was assessed based on  
337 the match between genotyped replicates using script repMatchStats.pl. Overall agreement  
338 between replicates was 98.7% or better with the heterozygote discovery rate (fraction of matching  
339 heterozygote calls among replicates) exceeding 96%.

340

#### 341 *Genome-wide genetic divergence*

342

343 To begin to characterize genome-wide divergence between populations we used pairwise  
344 genome-wide Weir and Cockerham's  $F_{ST}$  calculated by vcftools (38), principal component  
345 analysis (PCA) using R package adegenet (39), and ADMIXTURE (40). For PCA and  
346 ADMIXTURE, the data were thinned to keep SNPs separated by 5kb on average and by at least  
347 2.5 kb, choosing SNPs with highest minor allele frequency (script thinner.pl with options  
348 'interval=5000 criterion=maxAF').

349

#### 350 *Demographic analysis and bootstrapping*

351

352 Prior to demographic analysis, Bayescan (41) was used to identify sites potentially under  
353 divergent selection among populations, and 13 such sites with q-value <0.05 were removed.  
354 Demographic models were fitted to 120 bootstrapped datasets, which were generated in two  
355 stages. First, five alternatively thinned datasets were generated for which SNPs were randomly  
356 drawn to be on average 5 kb apart and not closer than 2.5 kb. This time the SNPs were drawn at  
357 random to avoid distorting the allele frequency spectrum unlike thinning for PCA and  
358 ADMIXTURE where the highest minor allele frequency SNPs were selected. Then, 20  
359 bootstrapped replicates were generated for each thinned dataset by resampling contigs of the  
360 reference genome with replacement (script dadiBoot.pl). The fitted model parameters were  
361 summarized after excluding bootstrap replicates that fell into the lowest 15% likelihood quantile  
362 and the ones where model fitting failed to converge, leading to some parameters being  
363 undetermined or at infinity (less than 10% of total number of runs). Delta-AIC values were  
364 calculated for each bootstrap replicate that passed these criteria for both compared models, and  
365 summarized to obtain bootstrap support value, the percentage of replicates favoring the  
366 alternative model. While fitting *dadi* models, the data for each population were projected to  
367 sample sizes maximizing the number of segregating sites in the analysis, resulting in 7000-8172  
368 segregating sites per population.

369

#### 370 *Unit conversion*

371

372 To convert *dadi*-reported coalescent parameter values ( $\theta$ ,  $T$  and  $M$ ) into time in years ( $t$ ), effective  
373 population sizes in number of individuals ( $N_e$ ) and migration rates as fraction of new immigrants  
374 per generation ( $m$ ), we estimated the mutation rate ( $\mu$ ) from the time-resolved phylogeny of

375 *Acorpora* genus based on *paxC* intron (42), at  $4e-9$  per base per year. Although *A. millepora* was  
376 shown to start reproducing in 3 years (18) we assumed the generation time of 5 years reasoning  
377 that it would better reflect the attainment of full reproductive potential as the colony grows.  
378 Assuming a genome size of  $5e+8$  bases (33) the number of new mutations per genome per  
379 generation is 10. Since the fraction 2bRAD-sequenced genome in our experiment was  $1.8e-3$ , the  
380 mutation rate per 2bRAD-sequenced genome fraction per generation is  $\mu = 0.018$ . This value was  
381 used to obtain:

- 382 - Ancestral effective population size:  $Ne = \theta / 2\mu$
- 383 - Migration rate:  $m = M / 2Ne$
- 384 - Time in years:  $t = 2TNe \cdot 5$

385

### 386 *Biophysical model*

387

388 A spatially-explicit biophysical modeling framework (12, 43) was used to quantify migration  
389 between coral reef habitats of the broader region surrounding the Great Barrier Reef, thereby  
390 revealing the location, strength, and structure of a species' potential population connectivity. The  
391 model's spatial resolution of ca. 8 km coincides with hydrodynamic data for the broader region  
392 ( $1/12.5$  degree; HYCOM+NCODA Reanalysis and Analysis product; [hycom.org](http://data.unep-wcmc.org/datasets/1)). Our  
393 biophysical dispersal model relies on geographic data describing the seascape environment and  
394 biological parameters capturing coral-specific life-histories. Coral reef habitat data are available  
395 from the UNEP World Conservation Monitoring Centre (UNEP-WCMC; [http://data.unep-](http://data.unep-wcmc.org/datasets/1)  
396 [wcmc.org/datasets/1](http://data.unep-wcmc.org/datasets/1)) representing a globally-consistent and up-to-date representation of coral  
397 reef habitat. To capture specific inter-annual variability, two decades of hydrodynamic data were  
398 used from 1992 to 2013 (44).

399

400 Coral-specific biological parameters for *A. millipora* included relative adult density (dependent  
401 on the habitat), reproductive output, larval spawning time and periodicity (e.g., Magnetic Island  
402 populations spawn a month earlier than the other GBR sites (45)), maximum dispersal duration,  
403 pre-competency and competency periods, and larval mortality (46, 47). The spatially explicit  
404 dispersal simulations model the dispersal kernel (2-D surface) as a 'cloud' of larvae, allowing it  
405 to be concentrated and/or dispersed as defined by the bio-physical parameters. An advection  
406 transport algorithm is used for moving larvae within the flow fields (48).

407

408 Simulations were carried out by releasing a cloud of larvae into the model seascape at all  
409 individual coral reef habitat patches and allowing the larvae to be transported downstream by the  
410 currents. Ocean current velocities, turbulent diffusion, and larval behavior move the larvae  
411 through the seascape at each time-step. Larval competency, behavior, density, and mortality  
412 determine when and what proportion of larvae settle in habitat cells at each time step. When  
413 larvae encounter habitat, the concentration of larvae settling with the habitat is recorded at that  
414 time-step. From the dispersal data, we derived the coral migration matrix representing the  
415 proportion of settlers to each destination patch that came from a source patch, which is analogous  
416 to the source distribution matrix (49) and is equivalent to migration matrices derived from

417 population genetic analysis. It is important to note that migration matrices extracted for the field  
418 sites represent the potential migration through all possible stepping-stones.

419

#### 420 *Metapopulation adaptation model*

421

422 The model was implemented in SLiM the forward evolutionary simulator, by modifying the  
423 provided recipe “Quantitative genetics and phenotypically-based fitness”. The model simulates  
424 Fisher-Wright populations with discreet generations. At the start of the simulation, populations  
425 were established at specified population sizes and pairwise migration rates (genetic replacement  
426 rates), and all QTLs in all individuals were given a mutation with the effect size drawn from a  
427 normal distribution with mean zero and specified standard deviation, to create standing genetic  
428 variation. The phenotype of each individual was calculated as the sum of QTL effects plus  
429 random noise to simulate desired heritability. Then, fitness of each individual was calculated  
430 based on the difference between the individual’s phenotype (thermal optimum), temperature of  
431 the environment, and the setting for phenotypic plasticity, modeled as the standard deviation of  
432 the Gaussian slope of fitness decline with increasing distance between phenotype and  
433 environment. Then, parents were chosen to produce the next generation according to their fitness;  
434 parents for immigrant individuals are chosen from among individuals in the source population.  
435 New mutations at QTLs happened at the specified rate when transitioning to the next generation  
436 and the effect of a new mutation replaced the previous QTL effect.

437

438 Our code was designed for general modeling of multilocus adaptation in metapopulations and can  
439 process matrices of population sizes and migration rates for an arbitrary number of populations.  
440 We modeled our five populations with effective population sizes and pairwise migration rates  
441 inferred by *dadi*. Within the code, it is also possible to adjust:

442

- 443 - Number of QTLs and the distribution of their effect sizes. To keep the model conservative,  
444 we modeled only ten QTLs with normal distribution of effect sizes with a standard deviation  
445 of 0.2°C. With ten QTLs, this setting implied that at the start of simulation only about 2% of  
446 corals deviated from mean thermal tolerance by more than 1.5°C in either direction. Since  
447 thermal differences between our populations exceeded 3°C, this narrow variation made local  
448 adaptation rather non-trivial.
- 449 - Dominance of QTLs (set to 0.5 in our simulation).
- 450 - Phenotypic plasticity. We modeled three plasticity settings, 0.5, 1 and 2, which corresponded  
451 to 86%, 40% and 13% fitness drop when the individual’s phenotypic optimum (calculated  
452 based on QTLs and heritability setting) mismatched the environment by 1°C.
- 453 - Heritability (proportion of phenotypic variation explained by genetics). We examined values  
454 1, 0.5, 0.25 and 1e-5, the latter to confirm that no adaptation or evolution was observed when  
455 the trait was not heritable.
- 456 - Mutation rate, which was set to zero because we wanted to explore only the role of standing  
457 genetic variation.

458

459 To better model population dynamics during warming period, we implemented linear scaling of  
460 the population size and immigration rates with the population's mean fitness. In this way, a  
461 population declining in fitness shrinks in size and stops contributing migrants to other  
462 populations.

463  
464 Environmental conditions are supplied to our model as a table of values for each population in  
465 every generation and can be arbitrary. Here we modeled identical thermal trends across  
466 populations with population-specific offsets. During pre-adaptation period lasting 2000  
467 generations, the temperature was constant on average but experienced random fluctuations  
468 across generations drawn from a normal distribution with a standard deviation of 0.25°C (to  
469 approximate ENSO events). The temperature was offset by +1.6°C in Wilkie and Magnetic  
470 populations and by -1.8°C in the Keppel population, to model differences in midsummer  
471 monthly mean temperature among populations (Fig. 1). After 2000 generations a linear increase  
472 at 0.05°C per generation was added to simulate warming.

473  
474 All combinations of parameter settings were run ten times to ensure consistency. We found that  
475 with population sizes in thousands, such as in our case, the results were very consistent among  
476 independent runs. We therefore did not aggregate results over many replicated runs but show one  
477 randomly chosen run for each tested parameter combination.

#### 478 479 **Acknowledgements**

480  
481 We wish to thank Ryan Gutenkunst and Benjamin Haller for their continuous support of *dadi* and  
482 SLiM users, respectively. The bioinformatics analysis was accomplished using computational  
483 resources of the Texas Advanced Computer Center. This study has been supported by NSF  
484 (DEB-1054766) grant to M.V.M, ARC (LP120200245) and University of Melbourne ECR grants  
485 to E. A.T., a Coral Reef Alliance grant ("Coral Adaptation Challenge") to E.A.T and M.V.M,  
486 Queensland Government funding to L.K.B and AIMS funding to L.K.B. and M.J.V.O

#### 487 **Data and code availability**

488 The finalized genotyping dataset in VCF format, detailed bioinformatic walkthrough, accessory  
489 formatting and plotting scripts, *dadi* scripts and the SLiM model code are available from  
490 <https://github.com/z0on/Adaptive-pathways-of-coral-populations-on-the-Great-Barrier-Reef>. Raw  
491 sequencing data has been deposited to National Center for Biotechnology Information's Short  
492 Reads Archive (accession number pending).

493

494 **References**

495

- 496 1. A. C. Baker, P. W. Glynn, B. Riegl, Climate change and coral reef bleaching: An ecological assessment  
497 of long-term impacts, recovery trends and future outlook. *Estuar. Coast. Shelf Sci.* **80**, 435–471 (2008).
- 498 2. C. A. Logan, J. P. Dunne, C. M. Eakin, S. D. Donner, Incorporating adaptive responses into future  
499 projections of coral bleaching. *Glob. Chang. Biol.* **20**, 125–139 (2014).
- 500 3. T. P. Hughes *et al.*, Climate change, human impacts, and the resilience of coral reefs. *Science*. **301**,  
501 929–933 (2003).
- 502 4. J. M. Pandolfi, S. R. Connolly, D. J. Marshall, A. L. Cohen, Projecting coral reef futures under global  
503 warming and ocean acidification. *Science*. **333**, 418–22 (2011).
- 504 5. G. B. B. Dixon *et al.*, Genomic determinants of coral heat tolerance across latitudes. *Science*. **348**,  
505 1460–1462 (2015).
- 506 6. P. K. Ingvarsson, Restoration of genetic variation lost – the genetic rescue hypothesis. *Trends Ecol.*  
507 *Evol.* **16**, 62–63 (2001).
- 508 7. G. De’ath, K. E. Fabricius, H. Sweatman, M. Puotinen, The 27-year decline of coral cover on the Great  
509 Barrier Reef and its causes. *Proc. Natl. Acad. Sci. U. S. A.* **109**, 17995–9 (2012).
- 510 8. S. Wang, E. Meyer, J. K. McKay, M. V Matz, 2b-RAD: a simple and flexible method for genome-wide  
511 genotyping. *Nat. Methods*. **9**, 808–810 (2012).
- 512 9. M. J. H. van Oppen, V. Lukoschek, R. Berkelmans, L. M. Peplow, A. M. Jones, A population genetic  
513 assessment of coral recovery on highly disturbed reefs of the Keppel Island archipelago in the southern  
514 Great Barrier Reef. *PeerJ*. **3**, e1092 (2015).
- 515 10. M. J. H. Van Oppen, L. M. Peplow, S. Kininmonth, R. Berkelmans, Historical and contemporary factors  
516 shape the population genetic structure of the broadcast spawning coral, *Acropora millepora*, on the  
517 Great Barrier Reef. *Mol. Ecol.* **20**, 4899–4914 (2011).
- 518 11. R. N. Gutenkunst, R. D. Hernandez, S. H. Williamson, C. D. Bustamante, Inferring the joint  
519 demographic history of multiple populations from multidimensional SNP frequency data. *PLoS Genet.*  
520 **5**, e1000695 (2009).
- 521 12. E. A. Trembl, J. Roberts, P. N. Halpin, H. P. Possingham, C. Riginos, The emergent geography of  
522 biophysical dispersal barriers across the Indo-West Pacific. *Divers. Distrib.* **21**, 465–476 (2015).
- 523 13. E. A. Trembl *et al.*, Reproductive Output and Duration of the Pelagic Larval Stage Determine Seascape-  
524 Wide Connectivity of Marine Populations. *Integr. Comp. Biol.* **52**, 525–537 (2012).
- 525 14. J. Lough, A. Hobday, Observed climate change in Australian marine and freshwater environments. *Mar.*  
526 *Freshw. Res.* **62**, 984–999 (2011).
- 527 15. B. Charlesworth, Fundamental concepts in genetics: Effective population size and patterns of molecular  
528 evolution and variation. *Nat. Rev. Genet.* **10**, 195–205 (2009).
- 529 16. W. Renema *et al.*, Are coral reefs victims of their own past success? *Sci. Adv.* **2**, e1500850 (2016).
- 530 17. B. C. Haller, P. W. Messer, SLiM 2: Flexible, interactive forward genetic simulations. *Mol. Biol. Evol.*  
531 **34**, 230–240 (2017).
- 532 18. M. Vanessa, B. Baria, D. W. Dela Cruz, R. D. Villanueva, J. R. Guest, Spawning of three-year-old  
533 *Acropora millepora* corals reared from larvae in Northern Philippines. *Bull. Mar. Sci.* **88**, 61–62 (2012).
- 534 19. IPCC, *Climate Change 2007 - The Physical Science Basis. Contribution of Working Group I to the*  
535 *Fourth Assessment Report of the IPCC* (Cambridge University Press, New York, NY, 2007).
- 536 20. R. Berkelmans, M. J. H. van Oppen, The role of zooxanthellae in the thermal tolerance of corals: a  
537 “nugget of hope” for coral reefs in an era of climate change. *Proc. R. Soc. B-Biological Sci.* **273**, 2305–  
538 2312 (2006).
- 539 21. A. H. Baird, J. R. Guest, B. L. Willis, Systematic and biogeographical patterns in the reproductive  
540 biology of scleractinian corals. *Annu. Rev. Ecol. Evol. Syst.* **40**, 551–571 (2009).
- 541 22. K. Quigley, B. Willis, L. Bay, Heritability of the Symbiodinium community in vertically- and  
542 horizontally-transmitting broadcast spawning corals. *bioRxiv*. (2017).
- 543 23. E. J. Howells *et al.*, Coral thermal tolerance shaped by local adaptation of photosymbionts. *Nat. Clim.*  
544 *Chang.* **2** (2011), pp. 116–120.
- 545 24. F. P. Palstra, D. J. Fraser, Effective/census population size ratio estimation: a compendium and  
546 appraisal. *Ecol. Evol.* **2**, 2357–2365 (2012).

- 547 25. S. R. Palumbi, D. J. Barshis, N. Traylor-Knowles, R. A. Bay, Mechanisms of reef coral resistance to  
548 future climate change. *Science*. **344**, 895–8 (2014).
- 549 26. E. J. Howells, R. Berkelmans, M. J. H. van Oppen, B. L. Willis, L. K. Bay, Historical thermal regimes  
550 define limits to coral acclimatization. *Ecology*. **94**, 1078–1088 (2013).
- 551 27. D. Nettle, M. Bateson, Adaptive developmental plasticity: what is it, how can we recognize it and when  
552 can it evolve? *Proc. R. Soc. B Biol. Sci.* **282**, 20151005 (2015).
- 553 28. Great Barrier Reef Marine Park Authority, *Interim report on the environmental impacts of the 2016*  
554 *coral bleaching event*.
- 555 29. T. J. Done, Phase shifts in coral reef communities and their ecological significance. *Hydrobiologia*. **247**,  
556 121–132 (1992).
- 557 30. O. Hoegh-Guldberg *et al.*, Assisted colonization and rapid climate change. *Science*. **321**, 345–346  
558 (2008).
- 559 31. S. N. Aitken, M. C. Whitlock, Assisted Gene Flow to Facilitate Local Adaptation to Climate Change.  
560 *Annu. Rev. Ecol. Evol. Syst.* **44**, 367–388 (2013).
- 561 32. G. B. Dixon, L. K. Bay, M. V. Matz, Bimodal signatures of germline methylation are linked with gene  
562 expression plasticity in the coral *Acropora millepora*. *BMC Genomics*. **15**, 1109 (2014).
- 563 33. C. Shinzato *et al.*, Using the *Acropora digitifera* genome to understand coral responses to environmental  
564 change. *Nature*. **476**, 320-U82 (2011).
- 565 34. M. J. H. van Oppen, B. J. McDonald, B. Willis, D. J. Miller, The Evolutionary History of the Coral  
566 Genus *Acropora* (Scleractinia, Cnidaria) Based on a Mitochondrial and a Nuclear Marker: Reticulation,  
567 Incomplete Lineage Sorting, or Morphological Convergence? *Mol. Biol. Evol.* **18**, 1315–1329 (2001).
- 568 35. B. F. Voight, S. Kudaravalli, X. Wen, J. K. Pritchard, A map of recent positive selection in the human  
569 genome. *PLoS Biol.* **4**, e72 (2006).
- 570 36. I. K. Jordan *et al.*, A universal trend of amino acid gain and loss in protein evolution. *Nature*. **433**, 633–  
571 8 (2005).
- 572 37. A. Mckenna *et al.*, The Genome Analysis Toolkit: A MapReduce framework for analyzing next-  
573 generation DNA sequencing data. *Genome Res.* **20**, 1297–1303 (2010).
- 574 38. P. Danecek *et al.*, The variant call format and VCFtools. *Bioinformatics*. **27**, 2156–8 (2011).
- 575 39. T. Jombart, adegenet: a R package for the multivariate analysis of genetic markers. *Bioinformatics*. **24**,  
576 1403–5 (2008).
- 577 40. D. H. Alexander, J. Novembre, K. Lange, Fast model-based estimation of ancestry in unrelated  
578 individuals. *Genome Res.* **19**, 1655–64 (2009).
- 579 41. T. Günther, G. Coop, Robust identification of local adaptation from allele frequencies. *Genetics*. **195**,  
580 205–20 (2013).
- 581 42. Z. T. Richards, D. J. Miller, C. C. Wallace, Molecular phylogenetics of geographically restricted  
582 *Acropora* species: Implications for threatened species conservation. *Mol. Phylogenet. Evol.* **69**, 837–851  
583 (2013).
- 584 43. E. A. Treml, P. N. Halpin, D. L. Urban, L. F. Pratson, Modeling population connectivity by ocean  
585 currents, a graph-theoretic approach for marine conservation. *Landsc. Ecol.* **23**, 19–36 (2008).
- 586 44. E. P. Chassignet *et al.*, The HYCOM (HYbrid Coordinate Ocean Model) data assimilative system. *J.*  
587 *Mar. Syst.* **65**, 60–83 (2007).
- 588 45. R. C. Babcock *et al.*, Synchronous Spawning of 105 Scleractinian Coral Species on the Great-Barrier-  
589 Reef. *Mar. Biol.* **90**, 379–394 (1986).
- 590 46. S. W. Davies, E. A. Treml, C. D. Kenkel, M. V. Matz, Exploring the role of Micronesian islands in the  
591 maintenance of coral genetic diversity in the Pacific Ocean. *Mol. Ecol.* **24**, 70–82 (2015).
- 592 47. S. R. Connolly, A. H. Baird, Estimating dispersal potential for marine larvae: dynamic models applied  
593 to scleractinian corals. *Ecology*. **91**, 3572–3583 (2010).
- 594 48. P. K. Smolarkiewicz, J. Szmelter, An MPDATA-based solver for compressible flows. *Int. J. Numer.*  
595 *Methods Fluids*. **56**, 1529–1534 (2008).
- 596 49. R. K. Cowen, G. Gawarkiewicz, J. Pineda, S. Thorrold, F. Werner, Population Connectivity in Marine  
597 Systems: An Overview. *Oceanography*. **20**, 14–21 (2007).
- 598

599 **Supplemental Figures**

600

601

602

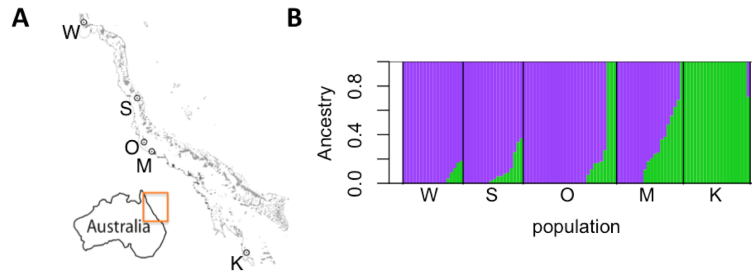

603

604

605

606

607

608

609

610

611

**Figure S1.** ADMIXTURE analysis of genetic differentiation between populations. (A) Map of sampled locations with one-letter population identifiers. (B) ADMIXTURE plot of ancestry proportions with  $K = 2$  (optimal  $K$  was 1).

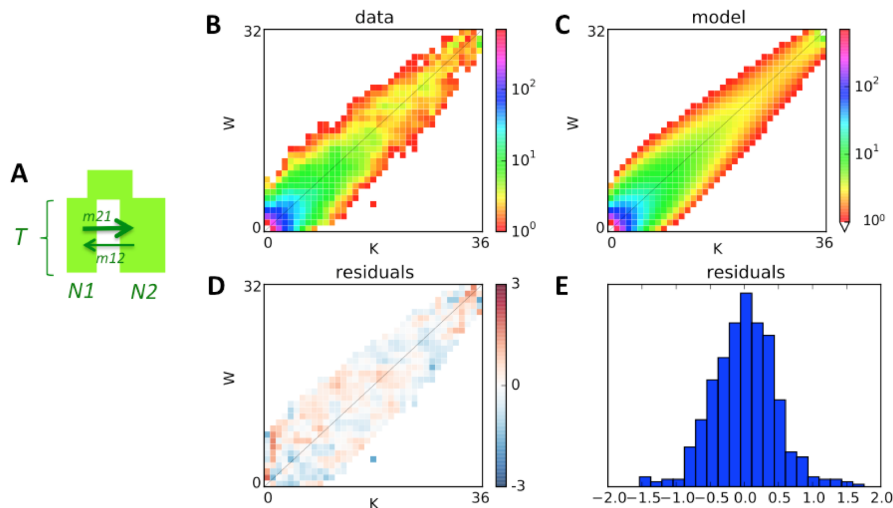

612

613

614

615

616

617

618

**Figure S2.** Example of two-population *dadl* model fit. (A) The model: ancestral population splits into two populations of unequal sizes ( $N1$  and  $N2$ ) some time  $T$  in the past, which exchange migrants with different rates depending on direction. (B) Observed allele frequency spectrum comparing Wilkie (W) and Keppel (K) populations. (C) Allele frequency spectrum generated by the fitted model. (D, E) Map and histogram of residuals (absolute scale).



619  
620  
621

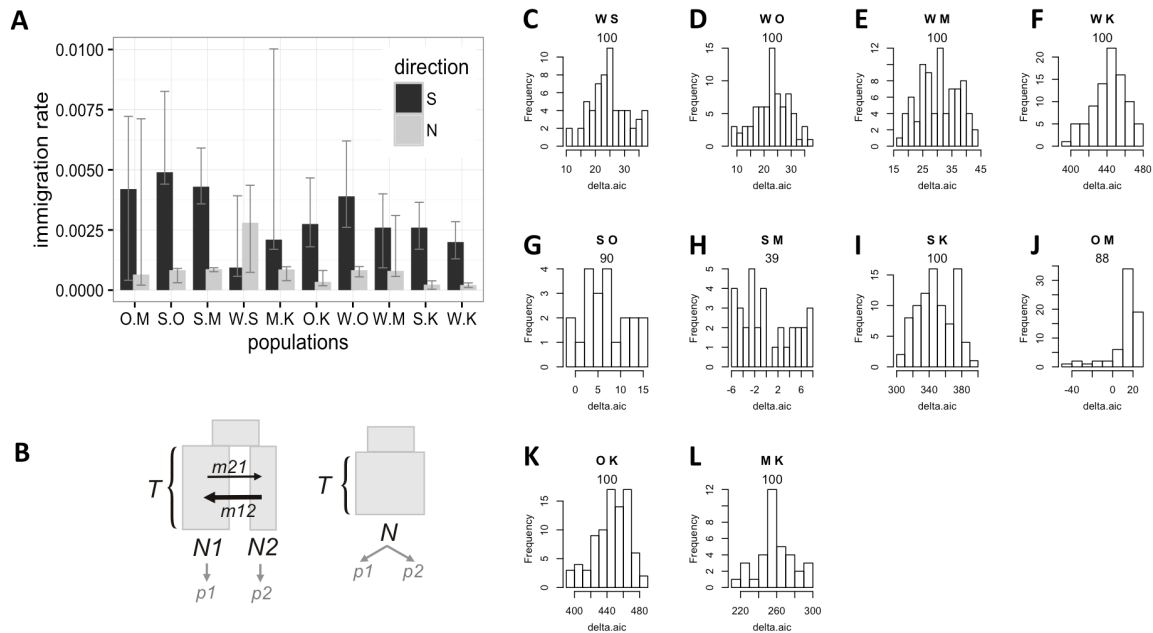

622  
623  
624  
625  
626  
627  
628  
629  
630  
631  
632  
633  
634  
635

**Figure S3.** Bootstrap analysis of migration rates and population subdivision using *dadi*. (A) Migration among population pairs, with bootstrap-derived 95% confidence intervals. The pairs are identified on the x-axis and sorted by increasing geographical distance. Black bars – southward migration, grey bars – northward migration. (B) Models being compared: the full model (left) implies populations' split into two different sizes ( $N1$  and  $N2$ ) at time  $T$  in the past, since when they exchanged migrants at unequal rates depending on direction. Reduced model allows for population size change at time  $T$  in the past but does not include population split: the two genotyped groups ( $p1$  and  $p2$ ) are regarded as two samples from the same population. (C-L) Histograms of delta-AIC values for 100 bootstrap replicates (bootstrap was performed over genomic contigs of the draft genome of *A. digitifera*). Positive numbers indicate support for the full model. The letters on top of each panel identify compared populations, the number is the proportion of positive bootstrap replicates (i.e., bootstrap support for the full model). The only comparison that did not receive >50% bootstrap support for population split is between S and M populations (panel H).

636  
637  
638  
639

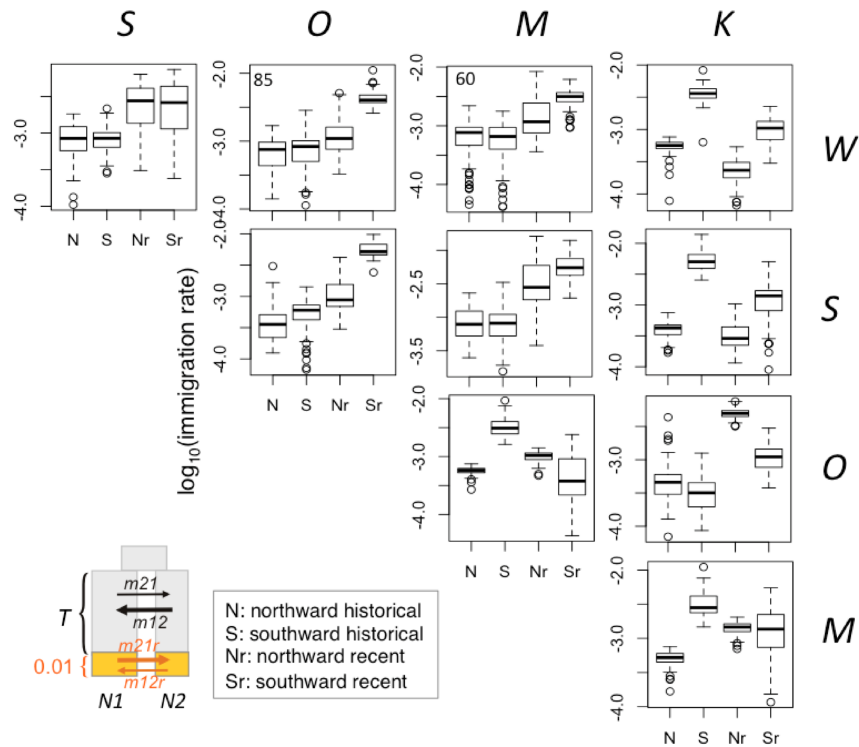

640  
641  
642  
643  
644  
645  
646  
647  
648  
649  
650  
651

Figure S4. Migration rates inferred by the *dadi* model allowing for the change in migration rates over the last 0.01  $T$  units (15-20 generations or 75-100 years, in our case). Box plots show historical (N, S) and recent (Nr, Sr) migration rates inferred among pairs of population across 100 bootstrap replicates. Numbers in the top left corner of the WO and WM plots are delta-AIC bootstrap support values for the model with the recent change in migration when compared to the split-with-migration model with no recent change (Fig. 1A). All other pairs had less than 50% delta-AIC bootstrap support. There is no consistent recent change in the preferential direction of migration.

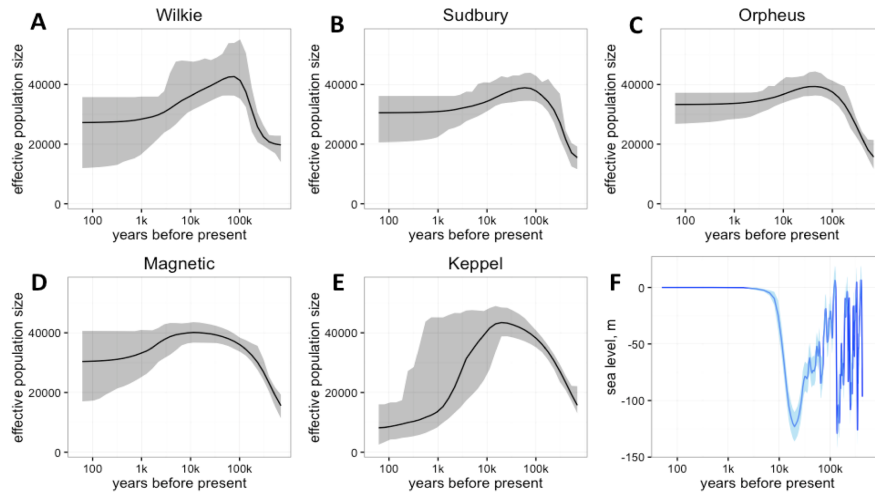

652  
653  
654  
655  
656

**Figure S5.** Population history. (A-E) Historical population sizes with bootstrap-derived 95% confidence intervals, according to the two-growth model (Fig. S6 A). (F) Sea level with shaded area corresponding to standard error (41).

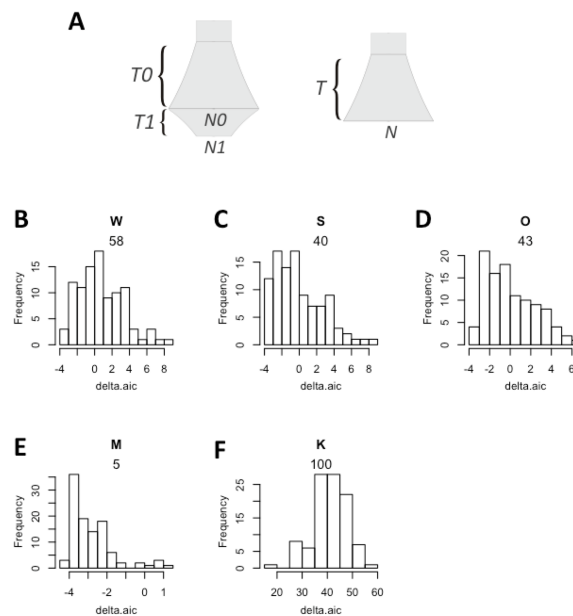

657  
658  
659  
660  
661  
662  
663  
664  
665  
666

**Figure S6.** Delta-AIC bootstrap analysis of single-population models. (A) Models compared. The full model (left) includes two exponential growth periods (any of which could be growth or decline), the reduced model (right) has only one growth period. (B-F) Histograms of delta-AIC values for 100 bootstrap replicates. Positive numbers indicate support for the full model. The letter on top of each panel identify the population, the number is the proportion of positive bootstrap replicates (i.e., bootstrap support for the full model). The two-growth model is strongly supported for population K (panel F) and marginally supported for population W (panel B).

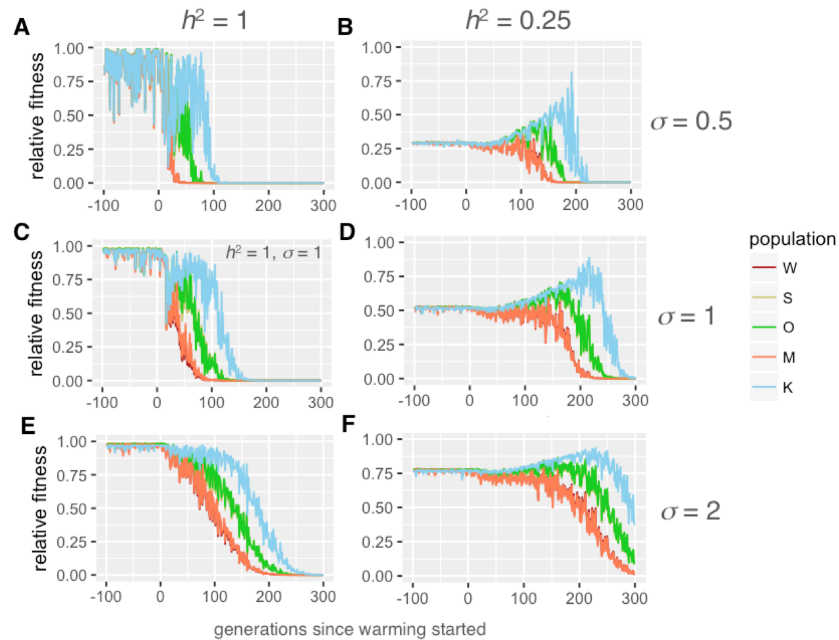

667  
668  
669  
670  
671  
672  
673  
674  
675  
676  
677  
678  
679

**Figure S7.** Fitness of modeled populations after pre-adaptation period and under warming, depending on heritability of thermal tolerance ( $h^2$ , proportion of phenotypic variation explained by genetics) and phenotypic plasticity ( $\sigma$ , standard deviation of the Gaussian slope of fitness decline away from the phenotypic optimum, in degrees C). X-axis is generations; warming starts at generation 0. Y-axis is fitness relative to maximal fitness at the genetically determined optimum. Warm-adapted populations (W and M) are shown as red-tint traces, populations from mild thermal regime (S and O) are green-tint traces, and the cool-adapted population (K) is the blue trace. Pairs of traces for warm- and mild-adapted populations largely overlap. (A, C, E):  $h^2=1$ . (B, D, F):  $h^2=0.25$ . (A, B):  $\sigma = 0.5$ . (C, D):  $\sigma = 1$ . (E, F):  $\sigma = 2$ . Higher plasticity facilitates metapopulation persistence during warming and confers stability against random fluctuations. Higher plasticity also partially rescues the drop in fitness achievable under low heritability (compare pre-warming generations, from -100 to 0, on panels B, D and F).

680

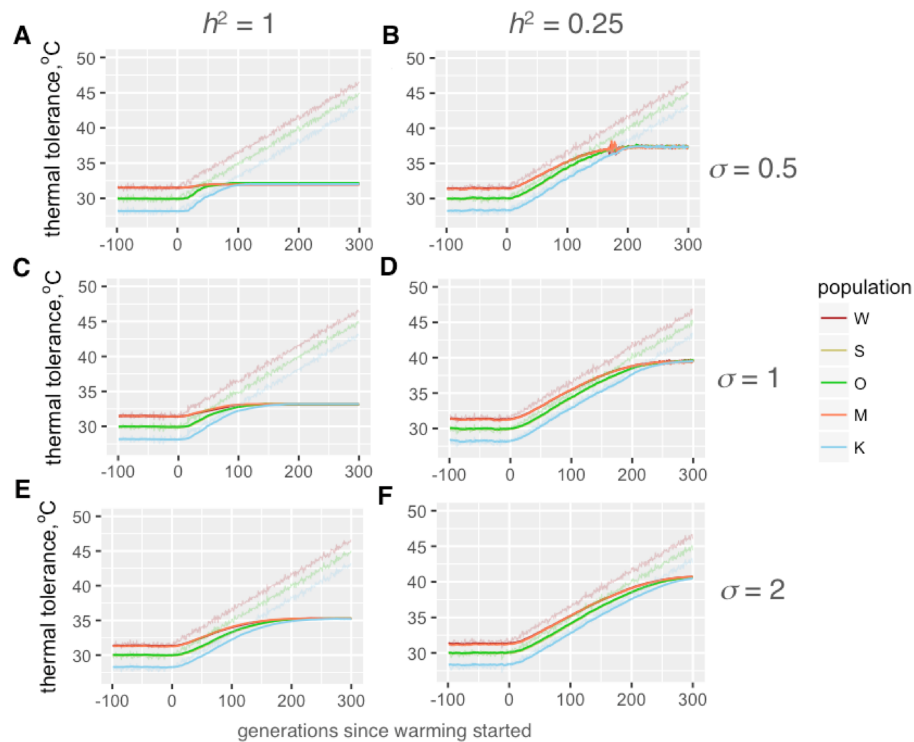

681

682

683 Figure S8. Higher plasticity and lower heritability promote longer and more extensive evolution in response  
684 to warming. The graphs show mean thermal tolerance of modeled populations after pre-adaptation period  
685 and under warming, depending on heritability of thermal tolerance ( $h^2$ , proportion of phenotypic variation  
686 explained by genetics) and phenotypic plasticity ( $\sigma$ , standard deviation of the Gaussian slope of fitness  
687 decline away from the phenotypic optimum, in degrees C). X-axis is generations; warming starts at  
688 generation 0. Y-axis is thermal tolerance (mean phenotype of the population). Warm-adapted populations  
689 (W and M) are shown as red-tint traces, populations from mild thermal regime (S and O) are green-tint  
690 traces, and the cool-adapted population (K) is the blue trace. Thin noisy lines are modeled temperatures at  
691 the corresponding locations. Pairs of traces for warm- and mild-adapted populations largely overlap. (A, C,  
692 E):  $h^2=1$ . (B, D, F):  $h^2=0.25$ . (A, B):  $\sigma = 0.5$ . (C, D):  $\sigma = 1$ . (E, F):  $\sigma = 2$ .

692

693

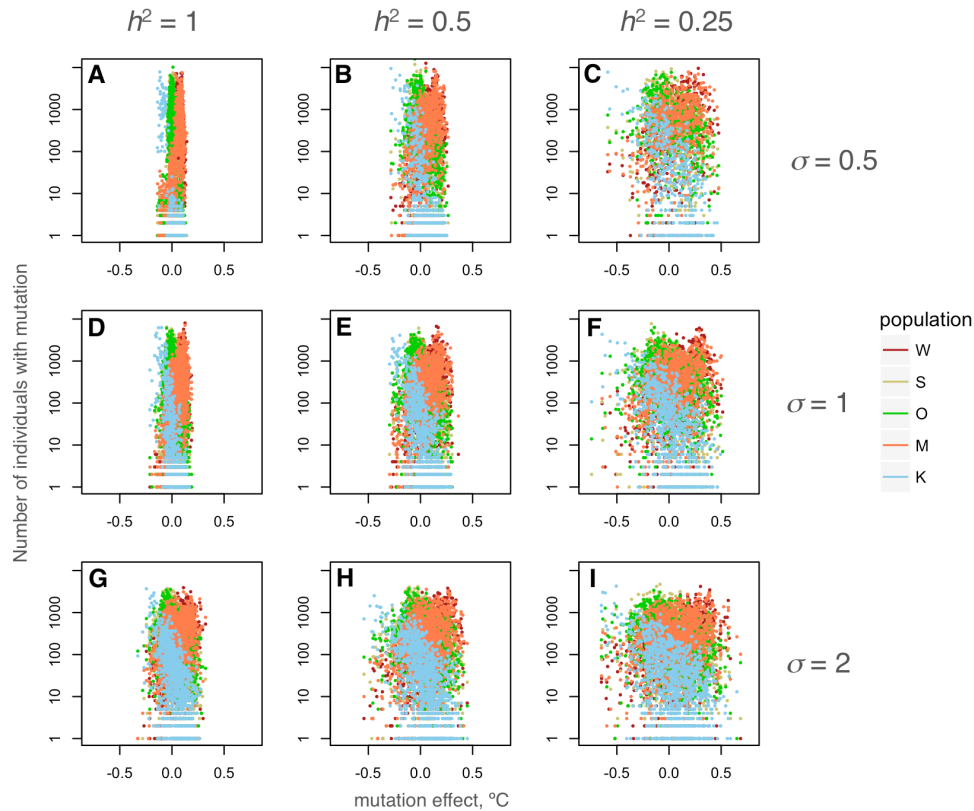

694  
695  
696  
697  
698  
699  
700  
701  
702  
703

**Figure S9.** Higher plasticity ( $\sigma$ ) and lower heritability ( $h^2$ ) promote retention of higher genetic variation in thermal tolerance. The scatterplots show the dependence of the number of individuals in a population bearing a mutation at a thermal QTL locus on the mutation's effect size (change in thermal tolerance, in °C) at the end of the pre-adaptation period (2000 generations with no directional change in temperature). The starting standing genetic variation was the same in all simulations. (A,D,E):  $h^2=1$ . (B,E,H):  $h^2=0.5$ . (C,F,I):  $h^2=0.25$ . (A-C):  $\sigma = 0.5$ . (D-F):  $\sigma = 1$ . (G-I):  $\sigma = 2$ . Populations are colored according to the color scheme used in Figures 3, S7 and S8 (see legend).
